## **Increased parasite load is associated with reduced metabolic rates and escape responsiveness in pumpkinseed sunfish host**

Joëlle Guitard<sup>1,2±</sup>, Emmanuelle Chrétien<sup>1</sup>, Jérémy De Bonville<sup>1</sup>, Dominique G. Roche<sup>3,4</sup>, Daniel Boisclair<sup>1</sup>, Sandra A. Binning<sup>1</sup>

±Author for correspondence ([joelle.guitardbio@gmail.com](mailto:joelle.guitardbio@gmail.com))

<sup>1</sup> Groupe de recherche interuniversitaire en limnologie et en environnement aquatique (GRIL), Département de sciences biologiques, Université de Montréal, Campus MIL, 1375 Av. Thérèse-Lavoie-Roux, Montréal, Québec, H2V 0B3, Canada

<sup>2</sup> Institut des sciences de la mer (ISMER), Université de Québec à Rimouski, 310 avenue des Ursulines, Rimouski, Québec, G5L 2Z9, Canada

<sup>3</sup> Institut de biologie, Université de Neuchâtel, Neuchâtel, Switzerland

<sup>4</sup> Department of Biology and Institute of Environmental and Interdisciplinary Sciences, Carleton University, Ottawa, Ontario, Canada

## 1 Abstract

2 Wild animals have parasites that can compromise their physiological and/or behavioural  
3 performance. Yet, the extent to which parasite load is related to intraspecific variation in performance  
4 traits within wild populations remains relatively unexplored. We used pumpkinseed sunfish (*Lepomis*  
5 *gibbosus*) and their endoparasites as a model system to explore the effects of infection load on host  
6 aerobic metabolism and escape performance. Metabolic traits (standard and maximum metabolic  
7 rates, aerobic scope) and fast-start escape responses following a simulated aerial attack by a predator  
8 (responsiveness, response latency, and escape distance) were measured in fish from across a gradient  
9 of visible (i.e. trematodes causing black spot disease counted on fish surfaces) and non-visible (i.e.  
10 cestodes in fish abdominal cavity counted post-mortem) endoparasite infection. We found that a  
11 higher infection load of non-visible endoparasites was related to lower standard and maximum  
12 metabolic rates, but not aerobic scope in fish. Non-visible endoparasite infection load was also related  
13 to decreased responsiveness of the host to a simulated aerial attack. Visible endoparasites were not  
14 related to changes in metabolic traits nor fast-start escape responses. Our results suggest that infection  
15 with parasites that are inconspicuous to researchers can result in intraspecific variation in physiological  
16 and behavioral performance in wild populations, highlighting the need to more explicitly  
17 acknowledge and account for the role played by natural infections in studies of wild animal  
18 performance.

19 **Keywords:** black spot disease, ecophysiology, fast-start escape response, infection intensity,  
20 respirometry, whole organism performance

## 21 Introduction

22 Experimental biologists studying wild animals often assume that their subjects are healthy and  
23 performing to the best of their abilities (e.g., Wilson et al., 2015). However, at any given moment,  
24 animals are host to a range of parasites or pathogens that can compromise their physiological and  
25 behavioural performance with significant ecological repercussions (Poulin et al., 1994; Marcogliese,  
26 2004; McElroy and de Buron, 2014; Binning et al., 2017 Timi and Poulin, 2020). For example,  
27 infection by the protozoan, *Ophryocystis elektroscirrha*, causes 14% shorter flight durations and 19%  
28 shorter flight distances in Monarch butterflies, *Danaus plexippus*, impairing their ability to  
29 successfully migrate (Bradley and Altizer, 2005). The problem of infection is not unique to animals  
30 caught in the wild. The microsporidium, *Pseudoloma neurophilia*, a common infection in laboratory  
31 populations of zebrafish, *Danio rerio*, alters zebrafish shoaling behaviour and startle responses  
32 (Spagnoli et al., 2015; Spagnoli et al., 2017). As a result, parasites may be an important, yet  
33 overlooked, driver of intraspecific trait variation in both wild and laboratory populations.

34 The pervasiveness of parasites in both terrestrial and aquatic systems has been repeatedly  
35 highlighted in the ecological literature (Poulin and Morand, 2000; Kuris et al., 2008; Caballero et al.,  
36 2015). Similarly, their physiological and behavioural effects on hosts can be dramatic. For instance,  
37 trophically-transmitted parasites can affect host predator-avoidance or risk-taking behaviours to  
38 facilitate transmission to their final host (Kuris, 2003; Blake et al., 2006; Parker et al., 2015). In  
39 killifish, *Fundulus parvipinnis*, individuals infected with larval trematodes swim to the surface, jerk,  
40 and shimmer more often than uninfected fish, rendering them 31 times more susceptible to predation  
41 by birds (Lafferty and Morris, 1996). Although parasites generally have a detrimental effect on host  
42 performance capacity (i.e. the ability of an organism to carry out an ecologically relevant tasks;

43 McElroy and de Buron, 2014), infection can also impact hosts in counter-intuitive ways. For  
44 example, high loads of the muscle-dwelling myxozoan, *Kudoa inornate*, are related to faster burst-  
45 swimming speeds and gait transition speeds in spotted seatrout, *Cynoscion nebulosus* (McElroy et al.,  
46 2015). Thus, the effects of parasite infection on individual performance capacity can be difficult to  
47 predict.

48 Performance capacity, including aerobic metabolic performance, can determine individual success  
49 in activities such as foraging, locomotion, reproduction and predator avoidance (Bennett, 1980; Arnold,  
50 1983). Aerobic metabolic performance is tightly linked to an organism's ability to uptake oxygen and  
51 can be estimated by measuring an animal's oxygen consumption rate ( $\dot{M}O_2$ ) as a proxy of whole-  
52 organism metabolic rate (Claireaux and Lefrançois, 2007; Chabot et al., 2016a). Two important  
53 physiological traits can be used to describe the upper and lower bounds of an animal's ability to  
54 metabolize oxygen. The maximum metabolic rate (MMR), and the standard metabolic rate (SMR) are  
55 defined, respectively, as the maximum and minimum amount of energy that can be metabolized  
56 aerobically by an organism (Hulbert and Else, 2000). In ectotherms, SMR is the minimal amount of  
57 energy needed for maintenance at a given temperature and is estimated by measuring  $\dot{M}O_2$  in a non-  
58 reproductive, resting, and post-absorptive state (Chabot et al., 2016b). MMR can be estimated by  
59 measuring an organism's  $\dot{M}O_2$  during or shortly after exhaustive exercise (Norin and Clark, 2016;  
60 Rummer et al., 2016). The difference between these two traits, the absolute aerobic scope (AS),  
61 represents an animal's ability to perform functions above those required for basic maintenance,  
62 including mounting an immune response, digesting, moving, growing and reproducing (Claireaux  
63 and Lefrançois, 2007). Parasites that interfere with any aspect of energy demand or physiology might  
64 affect the upper and lower bounds of an animal's AS, and therefore its capacity to carry out various

65 physiological or behavioural tasks. Notably, activation of the immune system during infection may  
66 lead to an increase in the host's SMR, and therefore, reduce its AS (Eraud et al., 2005; Bashir-Tanoli  
67 and Tinsley, 2014). Alternatively, parasite infection has also been found to decrease SMR when  
68 parasites are located in - or cause tissue damage to - metabolically active organs (Caballero et al.,  
69 2015; Ryberg et al., 2020). Similarly, parasites that affect tissues such as the gut, liver or skeletal  
70 muscles could impair MMR if they affect the ability of the animal to direct blood flow to these tissues  
71 (Coleman, 1993; Gentile and King, 2018). Host anaerobic performance may also be impaired during  
72 infection. In response to a predator attack, fishes often perform a sudden burst of anaerobically-  
73 powered swimming, known as a fast-start escape response (Domenici and Blake, 1997). Parasitic  
74 infection could alter both behavioural (responsiveness, response latency) and kinematic (escape distance,  
75 swimming speed, acceleration) components of fast-start escapes. For instance, a recent study reported that  
76 experimental infection with a gnathiid isopod ectoparasite in juvenile Ambon damselfish,  
77 *Pomacentrus amboinensis*, increased their escape latency to a simulated predator attack by 32%  
78 (Allan et al., 2020).

79         Assessing the effects of parasites on the physiological and behavioural performance of hosts  
80 necessitates a proper quantification of parasite load (i.e. the number of parasites in a host, a.k.a. infection  
81 intensity). There are many challenges associated with quantifying infection; it is time consuming and often  
82 requires detailed knowledge of parasite taxonomy. These reasons may explain why researchers tend to use  
83 individual infection status (infected vs. non-infected) rather than their actual loads (i.e. number of parasites  
84 in a host), to study the effect of infection on performance. Few studies have explicitly quantified the  
85 relationship between host physiological or behavioural performance in wild populations across a  
86 gradient of natural parasite infection (but see Ruehle and Poulin, 2019; Ryberg et al., 2020; Sun et

87 al., 2020). Moreover, parasites are often internal, and can only be counted post-mortem. As a result,  
88 parasites are not routinely considered in studies on wild animals (Dougherty et al., 2016). This oversight is  
89 unfortunate given the high prevalence of parasites in wild populations and their important ecological role  
90 (Timi and Poulin, 2020). One means by which some researchers have gotten around this problem is by  
91 focusing on the presence of visible infections that are easy to identify. For example, Happel (2019) used  
92 photos uploaded to the public database, iNaturalist ([www.inaturalist.org](http://www.inaturalist.org)), to explore the biogeography of  
93 black spot disease in fishes across North America. Black spot disease is caused by infection with the  
94 metacercaria of digenean trematodes and can easily be identified and quantified non-invasively through  
95 the presence of conspicuous black spots on a fish's surfaces. Heavy black spot loads in juvenile bluegill  
96 sunfish (*Lepomis macrochirus*) causes changes in oxygen consumption rates, body condition, and  
97 total body lipid content, reducing overwinter survival to nearly 0% for fish with more than 50 black  
98 spots (Lemly and Esch, 1984). These types of infections provide an unparalleled opportunity to consider  
99 effects of parasites on wild animals, and thus in experimental research using those animals. Since wild  
100 animals are often simultaneously co-infected with several parasite species (Bordes and Morand, 2011),  
101 identifying whether “visible” parasite loads, such as black spot disease are related to infection load with  
102 other “non-visible” parasites may provide researchers with a simple and useful means of accounting for  
103 parasite infections in their studies.

104 Here, we explored the relationship between parasite infection and aerobic metabolic  
105 performance as well as fast-start escape performance in wild-caught, naturally infected pumpkinseed  
106 sunfish, *Lepomis gibbosus*. First, we assessed whether visible infections can be used as a proxy of  
107 overall endoparasite burden, and thus costs, in hosts, by separately quantifying visible (i.e. trematode  
108 metacercaria causing black spot disease) and non-visible (i.e. other cestode and trematode

109 endoparasites) infections in fish. Next, we examined the relationship between parasite load and aerobic  
110 metabolism (MMR, SMR, AS) as well as escape performance (responsiveness, response latency,  
111 distance travelled) in wild caught fish. Although we were interested in testing for a relationship  
112 between visible and non-visible infections, we had no a priori prediction as to the direction of this  
113 relationship. Following the overall tendency for parasites to decrease host performance (McElroy and  
114 de Buron, 2014), we also predicted that aerobic metabolism and escape performance would be negatively  
115 related to greater parasite load in fish hosts.

## 116 Material and methods

### 117 Study species

118 Sunfishes (*Lepomis* sp.) are abundant in Eastern North America and have been used as model  
119 species in behavioural, ecological, and kinematic studies for decades (Brett and Sutherland, 1965;  
120 Lemly and Esch, 1984; Tytell and Lauder, 2008; Gerry et al., 2012; Crans et al., 2015) . Sunfishes  
121 are also hosts to a range of parasites (Margolis and Arthur 1979), which can have a negative impact  
122 on whole organism performance capacity (McElroy and de Buron, 2014; Binning et al., 2017). In  
123 particular, trematodes causing black spot disease are common in many populations of sunfish  
124 (Chapman et al., 2015). The trematodes that cause black spot disease have a complex life cycle  
125 requiring two intermediate hosts, typically a snail and a fish, with a piscivorous bird or mammal as  
126 the final host (Hunter and Hunter, 1938). Larval trematode cercaria emerge from the snail and encyst  
127 under the fish's skin, in fins and muscle, forming black spots approximately 21 days after infection  
128 (Hunter and Hunter, 1938; Huggins, 1959; Berra and Au, 1978). Pumpkinseed sunfish are hosts to  
129 many other endoparasites (e.g., cestodes; including *Proteocephalus* sp, other trematodes including  
130 yellow grub; *Clinostomum marginatum*), which can be counted and identified post-mortem (Margolis

131 and Arthur, 1979). Pumpkinseed sunfish naturally infected with black spots provide a great  
132 opportunity to assess the degree to which visible (i.e. black spot disease) and non-visible parasites (i.e.  
133 other endoparasites) impact the performance capacity of their hosts.

#### 134 Fish collection and housing

135 A total of 42 naturally parasitized pumpkinseed sunfish of similar size (total length:  $8.5 \pm$   
136  $0.7$  cm; mass  $10.24 \pm 2.46$  g; mean  $\pm$  standard deviation) were captured with minnow traps and seine  
137 nets in Lake Cromwell near the Université de Montréal's Station de biologie des Laurentides (SBL,  
138 Québec, Canada;  $45.98898^\circ\text{N}$ ,  $-74.00013^\circ\text{W}$ ) in July 2019. Individuals of this size at this location are  
139 typically between 2 and 4 years of age (scale-based age determination, unpublished data). Fish were  
140 transported to the SBL laboratory facilities within one hour of capture and received a hydrogen  
141 peroxide treatment (2.5 ml of 3%  $\text{H}_2\text{O}_2$  *per* litre of freshwater) for 30 minutes to remove ectoparasites,  
142 fungus or surface bacteria. Fish were then transferred to a 600L flow-through holding tank (215 x 60  
143 x 60 cm, length  $\times$  width  $\times$  height) supplied with water pumped from nearby Lake Croche  
144 ( $45.99003^\circ\text{N}$ ,  $-74.00567^\circ\text{W}$ ) and held following a 12 h:12 h light: dark cycle. Water was particle-  
145 filtered, oxygenated, and UV-sterilized before entering the holding tanks at a rate of 0.14 to 0.68  $\text{m}^3$   
146  $\text{hr}^{-1}$ , allowing a full water replacement every 1 to 4 hours (flow rate adjustments were made to  
147 maintain the water temperature near  $21^\circ\text{C}$ ; actual range:  $19^\circ\text{C}$  -  $21^\circ\text{C}$ ). Water temperature and oxygen  
148 levels were monitored twice daily (OxyGuard, Handy Polaris, Denmark) and excess food and debris  
149 were siphoned daily. Fish were left in the holding tank for 24 h before each individual was measured  
150 (wet mass (g), total (TL) and standard (SL) length (mm)). Each fish was identified with a unique  
151 three-colour code using visual implant elastomer tags (VIE; Northwest Marine Technology)  
152 implanted on each side of the dorsal fin with a 29G needle. Throughout all procedures, fish were



153 manipulated in individual water-filled plastic bags to minimize air exposure and stress. All fish were  
154 fed to satiation twice daily (8:30 AM and 6:30 PM) with a mix of bloodworms and commercial fish  
155 pellets (Nutrafin Bug Bites, Cichlid Formula) and were habituated for 3 to 5 days before the onset of  
156 experiments. After this habituation period, the fish underwent respirometry trials to estimate oxygen  
157 consumption. This study was conducted with approval from the Université de Montréal's animal care  
158 committee (Comité de déontologie de l'expérimentation sur les animaux; certificate number 19-034).

### 159 Respirometry trials

160 Metabolic traits (MMR, SMR, AS) were estimated as rates of oxygen uptake ( $\dot{M}O_2$ : mg O<sub>2</sub> hr<sup>-1</sup>)  
161 using intermittent flow respirometry. Two identical, separate experimental water baths, (78 cm x  
162 33 cm x 38 cm, length × width × height, 80 L) each contained four resting chambers made of Perspex  
163 cylinders (16 x 6 cm, length x diameter). The chambers were opaque with a transparent viewing  
164 window located on top. Each chamber was connected to a closed water circuit (491 ml; volume  
165 includes recirculation tubes) with a recirculation pump (to achieve adequate water mixing) on which  
166 a fiber-optic oxygen probe (firesting 4-channel oxygen meter, PyroScience GmbH, Aschen,  
167 Germany) was connected. Dissolved oxygen levels were measured every 3 seconds. The four  
168 chambers were connected to a flush pump operated by a digital timer programmed to turn on for  
169 four minutes and off for six minutes. This created a 10-minute loop allowing for a four-minute period  
170 of water replacement and oxygenation and a six-minute period where the chamber was sealed with  
171 no outside exchange of water. A third water bath where temperature was regulated via an aluminium  
172 coil pumping chilled water (Thermo Fisher Scientific, EK20 immersion cooler, USA) was used to  
173 keep water temperature in the chambers near 21°C (actual range: 20.8°C - 21.7°C). Water  
174 replacement in this bath was filed with filtered lake water (same as the holding tanks) pumped through

175 a UV-sterilizer. Background oxygen consumption rates ( $B_{\dot{M}O_2}$ ) were estimated in each empty  
176 chamber for 30 minutes before and after every respirometry trial. The respirometry chambers, tubing,  
177 pumps and water baths were cleaned every 3 days with a mix of warm water and 3% hydrogen  
178 peroxide ( $H_2O_2$ ) and left to dry outside in direct sunlight.

179 Fish were fasted for 24 hours prior to all respirometry experiments to ensure they were in a  
180 post-absorptive state (Clark et al., 2013; Chabot et al., 2016b). Each trial started with a 3-minute chase  
181 protocol followed by 1-minute of air exposure, a common method of estimating MMR in fishes that are  
182 poor endurance swimmers (Roche et al., 2013; Rummer et al., 2016). A fish was transferred to a circular  
183 chase arena (48 cm x 41 cm, height x diameter, 67 L) using a water-filled plastic bag. The fish was  
184 then chased by hand for 3 minutes. When the fish began to fatigue, the experimenter would lightly  
185 pinch the fish's tail to force swimming until it no longer swam. Fish were then removed from the  
186 arena and held out of the water for 1-minute. The fish was then placed into a respirometry chamber,  
187 which was immediately (less than 15s) sealed for 10 minutes to estimate MMR. Once all eight fish  
188 had been chased and the 10-minute measurements completed, control of the system was switched to  
189 the automatic timers running the 10-minute loops as described above for the next 18 to 20 hours,  
190 during which oxygen consumption rates of fish stabilized, and SMR could be estimated. Oxygen  
191 levels remained above 80% in the chambers during all trials. Once a respirometry trial was over, fish  
192 were removed from the chambers and returned to their holding tank to recover during 5 days before the  
193 escape response trials. This protocol follows best practices for collecting and reporting respirometry  
194 data as described in Killen et al., 2021.

## 195 Escape response trials

196 Escape response experiments were conducted to estimate a fish's reaction to a simulated aerial

197 predator attack. These experiments were performed between 8:30 AM and 5:00 PM, on fish that had  
198 been fasted for 12 to 20 h, to prevent them from regurgitating food during a trial and to maximize the  
199 energy available for swimming and recovery. The escape response arena and experimental protocol  
200 were based on designs and procedures described in Binning et al., (2014) and Roche, (2021). Briefly,  
201 fish were introduced to the escape response arena in a water-filled plastic bag to minimize air  
202 exposure. The arena was a 60 x 60 x 30 cm (length × width × height) acrylic clear bottom tank under  
203 which a mirror was suspended at a 45° angle to film the escape response from below. The escape  
204 response arena was filled with the same water as the holding tanks to a height of 8 cm, which limited  
205 vertical movements by the fish while permitting the full extension of their dorsal and pelvic fins. The  
206 water temperature in the arena was maintained at 21°C and changed every hour to control temperature  
207 and oxygen levels (>95% air saturation). Prior to the experiments, fish were left undisturbed in the  
208 arena for 10 minutes to acclimate. We used a mechano-acoustic stimulus located in the far-left corner  
209 of the arena to simulate an aerial attack. A weighted stimulus (iron bolt, 2,6 cm long) was released by  
210 an electromagnet and fell through an opaque PVC tube (22 cm long and 4 cm wide) suspended 1 cm  
211 above the water surface to avoid visual stimulation of the fish (Binning et al., 2014; Marras et al.,  
212 2011). Fish were stimulated when they were static (i.e. not swimming), had the stimulus in their field  
213 of view and were a maximum of 10 cm from the stimulus. Each individual was subjected to three  
214 trials, with a 10-minute interval between trials to allow recovery (see Jornod and Roche, 2015).  
215 Escape responses were filmed at 240Hz with a high-speed camera (EX-FH100, Casio, USA). Fish  
216 were euthanized following the escape response experiments with an overdose of eugenol solution and  
217 placed in a freezer at -18°C until they were dissected.

## 218 Fish dissection

219 The number of black spots were assessed by counting the number of cysts on the body surface  
220 and on all fins visible on the left side of each individual, so that the actual black spot number  
221 approximately double of what is reported in this study (Ferguson et al., 2010). Captured fish  
222 harboured a varying number of black spots (6-273 metacercariae quantified on the left side of the fish  
223 only). Fish body cavity, liver, digestive tract, muscles, and gills were dissected and inspected for  
224 internal parasites under a dissecting scope. Internal parasites were counted and identified to the  
225 species level. Two species of internal parasites were identified. *Proteocephalus ambloplites* was the  
226 most prevalent and abundant species (prevalence: 93%, min-max: 0-153 parasites per fish), and was  
227 mostly found in the liver and body cavity. *Clinostomum marginatum* was less prevalent (prevalence:  
228 26%, min-max: 0-7 parasites per fish) and found mostly encysted in the gills and muscle. To correct  
229 a fish's mass for the number of internal parasites it harboured, we weighed approximately 20  
230 individuals of each species of internal parasite and then divided this mass by the number of parasites  
231 to obtain an estimate of the mass of one individual parasite. This process was repeated five times with  
232 different internal parasites. We averaged these five estimates for each internal parasite species to get  
233 a mean individual parasite mass, and then corrected the mass of each fish by the number of parasites  
234 of each type it contained (parasite-corrected fish mass; hereafter fish body mass; Lagrue and Poulin,  
235 2015). Metacercariae causing black spots were not weighted as their collective mass was too small to  
236 be accurately estimated ( $\pm 0.000001$  g), and likely had no influence on overall fish mass.

## 237 Data extraction and analyses

### 238 *Respirometry data*

239 All oxygen consumption rates ( $\dot{M}O_2$ ) were extracted using the package *respR* (Harianto et al.,  
240 2019) in R v. 3.6.1 (R Foundation for Statistical Computing, 2019). Metabolic rate estimates ( $\dot{M}O_2$ ;

241 mg O<sub>2</sub> h<sup>-1</sup>) were calculated from the slopes obtained from the linear regression between oxygen  
242 concentration and time, accounting for the volume of the respirometer subtracting fish volumes  
243 (assuming a density of 1g/ml). The background respiration rate (B\_ $\dot{M}O_2$ ) was subtracted from the  
244  $\dot{M}O_2$  measurements assuming a linear increase in bacterial respiration from the start to the end of the  
245 trial. SMR was estimated from measurements taken ~10h after the onset of the trial (moment at which  
246  $\dot{M}O_2$  stabilized to a minimum level) until sunrise. The lowest 0.2 quantile of a minimum of 29 slopes  
247 (max number = 59) were used to estimate SMR with the *fishMO2* package (Chabot 2016; Chabot et  
248 al., 2016b); the mean R<sup>2</sup> of slopes for all fish was 0.99. We used the *respR* package (Harianto et al.,  
249 2019) to estimate MMR with a rolling regression that determines the highest rate of change in oxygen  
250 over 60 seconds in the 10-minute measurement following the chase and air exposure protocol, after  
251 excluding the first 30 seconds. Absolute AS was calculated as the difference between MMR and SMR  
252 (Halsey et al., 2018). Metabolic rates were estimated for 39 fish; data from 3 individuals were  
253 excluded because of irregularities in the  $\dot{M}O_2$  readings due to an air leak.

#### 254 *Escape response data*

255 We analyzed the behavioural components of escape responses using VLC media player  
256 (VideoLAN, Paris, France). Responsiveness was assessed over the three trials: for each trial, we  
257 recorded whether a fish responded to the stimulus (i.e. performed a c-start following contact of the  
258 stimulus with the water). Escape latency (sec) was calculated from the number of frames between  
259 the first contact of the stimulus on the water and the first head movement of the fish initiating an  
260 escape response. Since fish did not respond to the stimulus in all trials, we assessed response latency  
261 by recording the best performance (shortest time to respond) of an individual across the three trials  
262 (Domenici, 2010). Best performance for the distance travelled (*Desc*) was also used for the analysis.

263 Stage 1 of the fast-start response started at the first head movement of the fish followed by stage 2  
264 which was defined as the first reversal movement of the head and ended once the fish's body  
265 straightened during the contralateral contraction resulting in a half tail beat (Domenici and Blake,  
266 1997; Eaton et al., 2001). Lolitrack 5 (Loligo Systems, Copenhagen, Denmark) was used to track a  
267 fish's center of mass (CoM) and extract the three following variables: (1) escape distance ( $D_{\text{esc}}$ );  
268 distance covered in a fixed amount of time, (2) maximum speed ( $U_{\text{max}}$ ), and (3) maximum  
269 acceleration ( $A_{\text{max}}$ ). Following the onset of stage one, all variables were measured over 54  
270 milliseconds, which corresponds to the mean duration of stages 1 and 2 for all fish. We used ImageJ  
271 (National institutes of Health, Maryland, USA) to estimate (4) a fish's distance to the stimulus prior  
272 to the stimulus touching the water (i.e. the straight-line distance between the fish's CoM and the  
273 center of the stimulus), and (5) the fish's orientation relative to the stimulus (i.e. the angle formed by  
274 a) the linear segment relating the fish's CoM to the center of the stimulus and b) the linear segment  
275 relating the fish's CoM to its snout (Jornod and Roche 2015). These measures (4 and 5) were included  
276 in the models to verify whether the fish's position relative to the stimulus influenced escape  
277 responsiveness, latency or  $D_{\text{esc}}$ . We did not examine the effect of parasites on maximum speed and  
278 acceleration to reduce the number of statistical tests and since they are the first and second derivative  
279 of distance which is analysed in this study.

## 280 *Statistical analyses*

281 All data were analyzed in R v. 3.6.1 (R Foundation for Statistical Computing 2019). Pearson's  
282 correlation coefficient was used to test for a relationship between visible and non-visible infections in  
283 pumpkinseed sunfish. We included 44 fish collected at the same time and with the same collection methods  
284 from another study. General linear models (LM; lm function in R) were used to model the effect of

285 parasite load on metabolic traits (MMR, SMR and AS). The number of internal parasites, number of  
286 black spots, fish body mass (parasite-corrected fish mass), the interaction between the number of  
287 internal parasites and fish body mass, and the interaction between the number of black spots and fish  
288 body mass were included as predictors in all three models of metabolic traits. Collinearity between  
289 fixed factors in the models was assessed using the variance inflation factor (VIF; *vif* function in *car*  
290 package; Fox and Weisberg, 2011). The number of black spots and fish body mass were correlated  
291 ( $n=42$ ; Pearson's correlation  $r=0.38$ ,  $P=0.01$ ), but the VIF terms for these predictors were low (2 at  
292 most), so we kept both in all of our models (Legendre and Legendre, 2012). Since fish body mass  
293 and fish total length were highly correlated ( $n=42$ ; Pearson's correlation  $r=0.96$ ,  $P<0.001$ ; Fig.  
294 S1), only one of the two was used as a predictor in each model; fish body mass was used in models  
295 with metabolic traits as response variables, and total length was used in models with measures of  
296 escape performance as response variables.

297 A general linear model was used to quantify the effect of parasite load on response latency.  
298 Response latency was  $\log_{10}$  transformed to meet model assumptions. The number of internal  
299 parasites, number of black spots, fish total length, distance, and angle of the fish relative to the  
300 stimulus, the interaction between the number of internal parasites and fish total length as well as the  
301 interaction between the number of black spots and fish total length were included as fixed effects in  
302 the model.

303 A general linear model was used to quantify the effect of parasite load on  $D_{\text{esc}}$ . The number of  
304 internal parasites, number of black spots, fish total length, distance, and angle of the fish relative to  
305 the stimulus, the interaction between the number of internal parasites and fish total length as well as  
306 the interaction between the number of black spots and fish total length were included as fixed effects

307 in the model.

308 We used a generalized linear mixed-effects model (GLMM) with a binomial error distribution  
309 (logit link) using the package *lme4* (Bates et al., 2014) to quantify the effect of parasite load on fish  
310 responsiveness during escape response experiments. Fish ID was included as a random effect. The  
311 number of internal parasites, number of black spots, fish total length, distance, and angle of the fish  
312 relative to the stimulus, and the interaction between the number of internal parasites and the number  
313 of black spots were included as fixed effects. Covariates in all models were z-transformed using the  
314 scale function in R. The angle of the fish relative to the stimulus was sine transformed following  
315 Roche (2021). Model assumptions were assessed visually with diagnostic plots and were met for all  
316 models (we used functions in the package *DHARMA* for GLMMs; Hartig, 2022): the residuals of all  
317 models were normal; no relationship was observed between the residuals and the observed variable  
318 and no deviation from the 1:1 line in qq-plots.

## 319 Results

320 The number of black spots found on a fish's left side ranged from 6 to 273 (median: 56.5), and the  
321 number of internal parasites between 0 and 153 (median: 15). Internal parasite counts include *P.*  
322 *ambloplites* and *C. marginatum* (see fish dissection section). We found no relationship between the  
323 number of internal parasites and the number of black spots present in a fish (n=86, Pearson's  
324 correlation  $r=0.12$ ,  $P=0.24$ ; Fig. S2). Therefore, visible, and non-visible loads were treated as separate  
325 variables in analyses.

326 Variation in MMR ranged from 2.3 to 7.5 mg O<sub>2</sub> h<sup>-1</sup> while SMR ranged from 0.42 to 2.9 mg O<sub>2</sub>  
327 h<sup>-1</sup>. There was a significant positive relationship between all three metabolic traits estimated and fish  
328 body mass (Table 1), and no significant interactions between parasite load (black spot and internal)



329 and fish body mass for any of the metabolic traits estimated (Table 1). None of the three metabolic  
330 traits estimated was related to black spot load (Fig. 1A, C, E); however, both MMR and SMR were  
331 negatively related to internal parasite load (Fig. 1B, D): fish with a higher number of internal parasites  
332 had both a lower MMR and SMR (Table 1). There was no relationship between of internal parasite  
333 load on AS (Table 1). Number of internal parasites ranged from 0 to 50 for all fish except for one  
334 individual harbouring 153 internal parasites. When this individual was excluded from the analysis,  
335 both MMR and SMR were still negatively related to internal parasite load (Table S1 and Fig. S6 A,  
336 B). Aerobic scope however decreased with internal parasite load when this individual was excluded  
337 (Table S1 and Fig. S6 C).

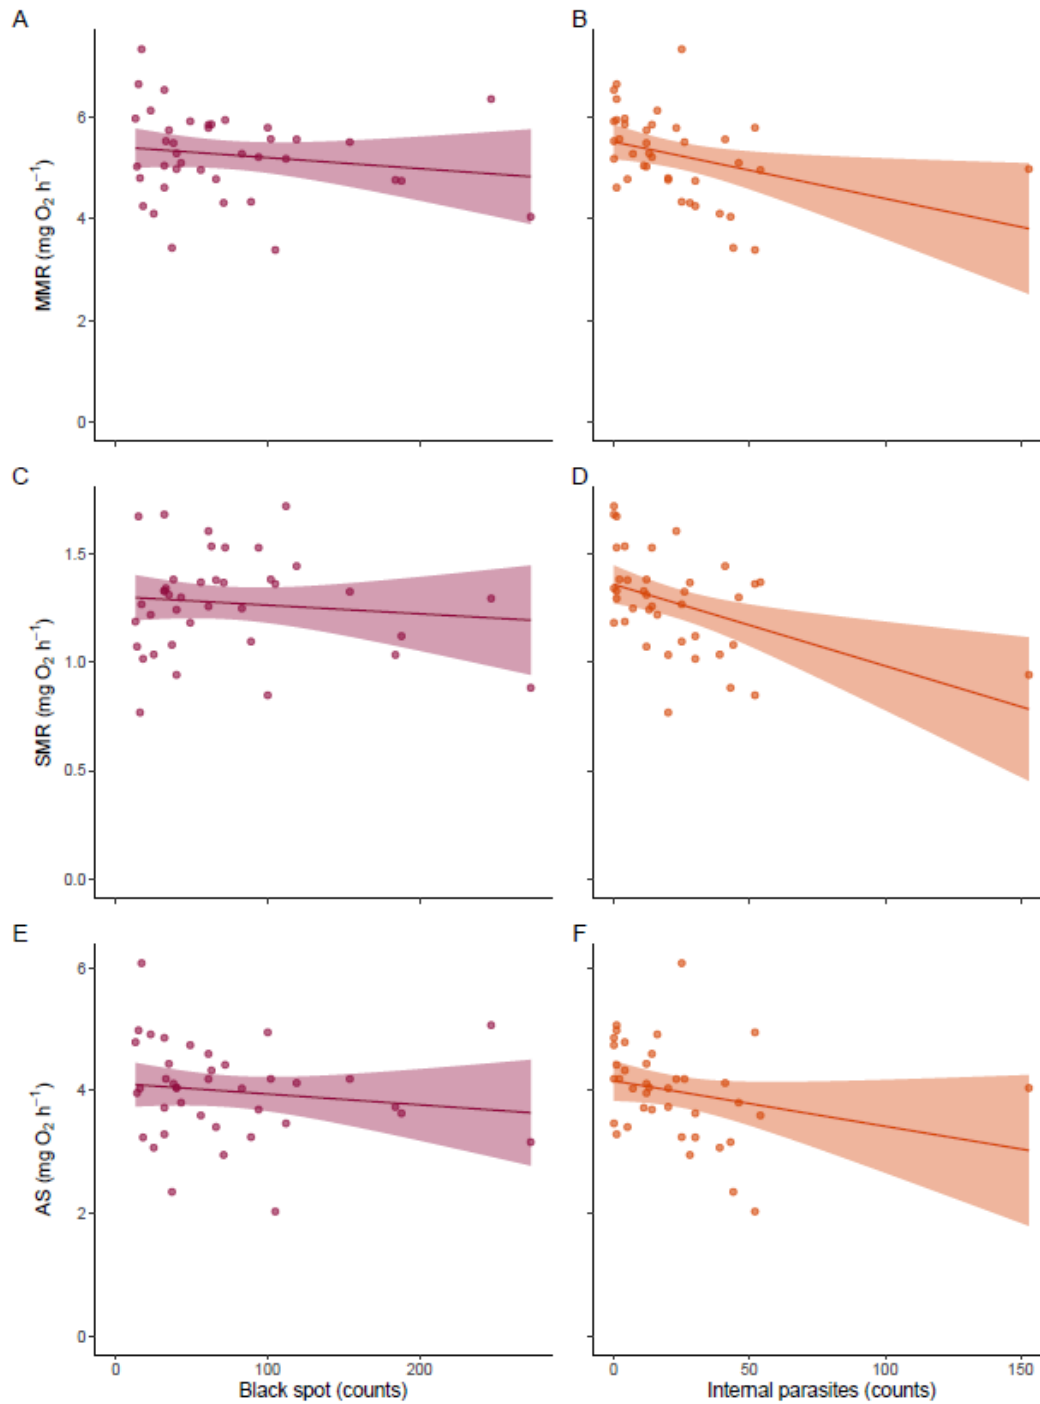

338

339 **Figure 1. Relationship between host metabolic traits and parasite load.** Mass-adjusted  
340 metabolic traits (MMR, SMR, AS) as a function of number of black spots (A, C, E) and number of  
341 internal parasites (B, D, F) in pumpkinseed sunfish (n=39). Points represent individual fish. The  
342 shading around the regression lines represents 95% confidence intervals. Mass-adjusted metabolic

343 rates are metabolic rates (MMR and SMR) adjusted to a common body mass (10.4 g) by adding  
 344 the residuals of a regression of log MR vs log body mass to the fitted model value for the average  
 345 body mass of all fish in the study. (See fig. S5 for the relationships between parasite load and  
 346 metabolic traits for fish with 0 to 50 parasites)

347  
 348 **Table 1.** Test statistics obtained from linear models (LM) of MMR, SMR and AS as a function of  
 349 black spots, internal parasites (Internal), fish body mass (Mass), the interactions between black spots  
 350 and mass (BS\*mass), the interaction between internal parasites and mass (Int\*mass) in pumpkinseed  
 351 sunfish from Lake Cromwell (n= 39). Statistically significant results are indicated in **bold**. (See  
 352 table S1 for test statistics for the relationship between parasite load and metabolic traits for fish  
 353 with 0 to 50 parasites)

| Response                                          | Predictors        | DF    | F-value | P-value          | R <sup>2</sup> |
|---------------------------------------------------|-------------------|-------|---------|------------------|----------------|
| <b>MMR</b><br>(mgO <sub>2</sub> h <sup>-1</sup> ) | Black spot        | 1, 33 | 0.82    | 0.37             | 0.67           |
|                                                   | Internal          | 1, 33 | 5.15    | <b>0.03</b>      |                |
|                                                   | Mass              | 1, 33 | 59.20   | <b>&lt;0.001</b> |                |
|                                                   | Black spot * mass | 1, 33 | 3.38    | 0.08             |                |
|                                                   | Internal * mass   | 1, 33 | 0.38    | 0.54             |                |
| <b>SMR</b><br>(mgO <sub>2</sub> h <sup>-1</sup> ) | Black spot        | 1, 33 | 0.44    | 0.51             | 0.38           |
|                                                   | Internal          | 1, 33 | 7.75    | <b>0.009</b>     |                |
|                                                   | Mass              | 1, 33 | 12.64   | <b>&lt;0.001</b> |                |
|                                                   | Black spot * mass | 1, 33 | 0.53    | 0.47             |                |
|                                                   | Internal * mass   | 1, 33 | 0.88    | 0.35             |                |
| <b>AS</b><br>(mgO <sub>2</sub> h <sup>-1</sup> )  | Black spot        | 1, 33 | 0.54    | 0.47             | 0.59           |
|                                                   | Internal          | 1, 33 | 2.27    | 0.14             |                |
|                                                   | Mass              | 1, 33 | 47.02   | <b>&lt;0.001</b> |                |
|                                                   | Black spot * mass | 1, 33 | 2.80    | 0.10             |                |
|                                                   | Internal * mass   | 1, 33 | 0.13    | 0.73             |                |

354

355 There was no relationship between response latency to an aerial attack and parasite loads (black  
 356 spot or internal) (LM: n=30, black spot: F=0.13, P=0.72; internal: F=1.05, P=0.31; Fig. 2), length  
 357 (LM: n=30, F=0.002 P=0.96), or distance and angle of the fish relative to the stimulus (LM: n=30,  
 358 distance: F=0.07, P=0.79, angle: F=3.73, P=0.07). None of the interactions between blackspots and  
 359 total length (P=0.09) or internal and total length (P=0.35) were significant.

360 There was no significant relationship between D<sub>esc</sub> and parasite load (black spot or internal)

361 (LM: n=35, black spot:  $F=1.32$ ,  $P=0.26$ ; internal:  $F=0.48$ ,  $P=0.26$ ), host total length (LM: n=35,  
362  $F=4.14$   $P=0.05$ ), distance or angle of the fish relative to the stimulus (LM: n=30, distance:  $F=0.99$ ,  
363  $P_{\text{dist}}=0.33$ , angle:  $F=0.26$ ,  $P=0.61$ ). None of the interactions between blackspots and total length  
364 ( $P=0.21$ ) or internal and total length ( $P=0.26$ ) were significant.

365

366         There were no significant interactions between any of the measured variables in the model  
367 with responsiveness to the stimulus as the response variable (Table 2). There was no relationship between fish  
368 responsiveness and black spot load (Fig. 3A; Table 2). However, there was a significant negative  
369 relationship between fish responsiveness to an aerial attack and fish length (GLMM: n=42,  $X^2=10.43$ ,  
370  $P<0.001$ ; Fig. S3) and a significant effect of the distance of the fish from the stimulus on  
371 responsiveness (Table 2). Larger fish responded less often than smaller conspecifics and fish further  
372 from the stimulus responded less to the simulated aerial attack. There was also a significant negative  
373 relationship between fish responsiveness and the number of internal parasites (GLMM: n=42,  
374  $X^2=4.62$ ,  $P=0.03$ ). Heavily infected fish responded less often to a simulated aerial attack than less  
375 infected fish (Fig. 3B). However, this relationship seemed to be driven by two heavily infected  
376 individuals (107 and 153 internal parasites respectively). When these individuals were removed from  
377 the analyses, this relationship was no longer present (GLMM: n=40,  $X^2=0.006$ ,  $P=0.94$ ; Fig. 3C).

378

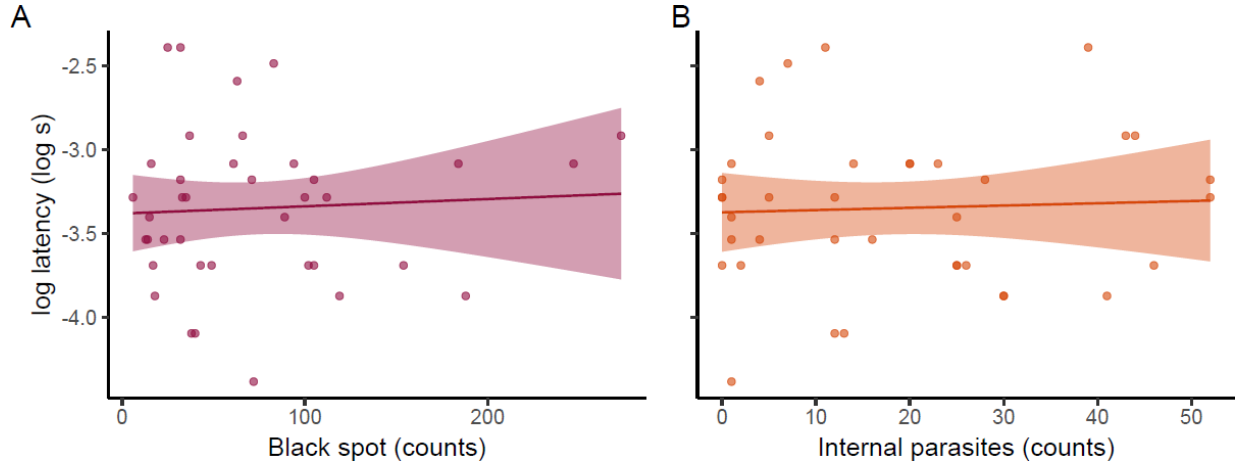

379

380 **Figure 2. Relationship between response latency and parasite load.** Influence of (A) black spots  
381 and (B) internal parasites on escape latency in pumpkinseed sunfish from Lake Cromwell (n=38).  
382 Points represent individual fish. The shading around the regression lines represent 95% confidence  
383 intervals.

384

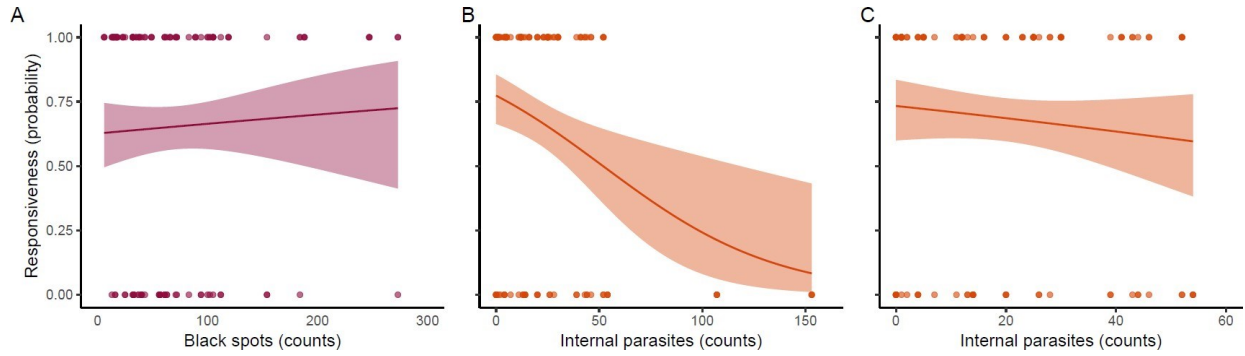

385

386 **Figure 3. Relationship between responsiveness to a simulated aerial attack and parasite load.**  
 387 (A) Effect of black spot, (B) internal parasites and (C) internal parasites excluding the two most  
 388 heavily infected individuals on the proportion of trials eliciting a fast-start during escape response  
 389 experiments in sunfish from Lake Cromwell (n=42). Points represent escape response  
 390 measurements (up to 3 per fish). The shading around the regression lines represent 95% confidence  
 391 intervals.

392

393 **Table 2. Generalized linear mixed-effects model (GLMM) estimates for black spot load,**  
 394 **internal parasite load, distance and angle of the fish from the stimulus and total length (TL)**  
 395 **on responsiveness of sunfish from Lake Cromwell.** Estimates are from the model without the  
 396 interactions. Marginal  $R^2$  for the model = 0.35

397

|              | DF | $X^2$ | P-value      | Estimates | $R^2$ |
|--------------|----|-------|--------------|-----------|-------|
| Blackspot    | 1  | 3.7   | 0.05         | 1.07      | 0.04  |
| Internal     | 1  | 4.62  | <b>0.03</b>  | -1.07     | 0.05  |
| Distance     | 1  | 10.67 | <b>0.001</b> | -3.48     | 0.20  |
| Angle        | 1  | 0.27  | 0.6          | 0.14      | 0.01  |
| Total length | 1  | 10.43 | <b>0.001</b> | -13.74    | 0.10  |
| BS*TL        | 1  | 0.12  | 0.73         |           |       |
| Int*TL       | 1  | 0.03  | 0.85         |           |       |

398

399

400

## 401 Discussion

402

Our results highlight the importance of considering parasite load when studying the

403 physiological and behavioural performance of wild animal populations. We found that metabolic rate  
404 estimates such as MMR and SMR, as well as responsiveness to a simulated predator attack decreased  
405 along a gradient of non-visible internal parasite infection in pumpkinseed sunfish. This is one of the  
406 first studies investigating the impacts of parasite load on aerobic metabolic and escape response  
407 performance in adults across two different types of infection (i.e. externally visible black spot  
408 infection vs. non-visible internal infections). Our results suggest that experimental studies interested in  
409 animal performance may be missing an important driver of intraspecific trait variation by not taking  
410 natural parasite infections into account.

411

## 412 Aerobic metabolic performance

413 Aerobic metabolic performance traits measured in pumpkinseed sunfish were not related to  
414 black spot load. Other studies have also found no noticeable effect of black spot infection on various  
415 aspects of host performance capacity. For example, black spot infection did not impact the critical  
416 thermal limit nor the body condition of three cyprinid species (Hockett and Mundahl, 1989).  
417 Similarly, Vaughans and Coble (1975) found no effect of black spot number on the length-mass  
418 relationship, temperature tolerance, or susceptibility of yellow perch, *Perca flavescens*, to predation.  
419 Black spot formation is the result of the host's immune system responding to trematode metacercaria  
420 encysting in the host tissues, usually the muscle or fins (Berra and Au, 1978). However, once  
421 encysted, metacercaria have very low metabolic costs, and, thus, are unlikely to have long-lasting  
422 direct effects on the host's metabolic traits once the infection is visible (Lemly and Esch, 1984).  
423 However, Lemly and Esch (1984) found that the oxygen consumption rates of bluegill sunfish increased  
424 approximately one month following experimental infection with the black spot-causing trematode,

425 *Uvulifer ambloplitis*. This corresponds to the average development time (21 days) of the parasite in  
426 this host and reflects the time-period during which the parasite likely extracts an energetic toll.  
427 Oxygen consumption rates returned to pre-infection levels two months after experimental infection  
428 (i.e. one month after the formation of visible cysts) suggesting that the metabolic costs of these  
429 infections are short-lived (Lemly and Esch, 1984). A recent meta-analysis also found that the host  
430 stress response to parasites is higher early in an infection (O'Dwyer et al., 2020). One rationale for  
431 exploring the effects of black spot trematodes on fish performance capacity was to assess whether  
432 this visible infection could be used as a proxy for overall infection load and costs given the ease with  
433 which black spots can be counted on their hosts. Unfortunately, we did not find a strong relationship  
434 between these visible infections and internal parasite load (Fig. 2A) meaning there is no shortcut to  
435 quantifying overall parasite load when assessing the impact of infection on individual performance  
436 traits.

437         Although we found no trend between black spot trematodes and aerobic metabolic traits, there  
438 were strong negative relationships between the intensity of internal parasite load and metabolic rates.  
439 Indeed, we found that both MMR and SMR were lower when internal parasite load was high. This  
440 trend was probably driven by infection with *P. ambloplites*, which was much more prevalent and  
441 abundant in our population than *C. marginatum* (93% vs. 26% prevalence; 0-153 vs. 0-7 parasites per  
442 fish respectively) and more likely to cause extensive tissue damage. *Proteocephalus ambloplitis*  
443 tapeworms infect sunfish through the ingestion of infected crustaceans (first intermediate host) such  
444 as copepods and cladocerans (Bangham, 1927). The cestode larvae then make their way through the  
445 fish's intestinal walls to the body cavity where they derive energy and nutrients from host tissues  
446 including the liver and gonads (Daly Sr. et al., 2006). As such, *P. ambloplites* can cause substantial



447 damage to the organs of its intermediate and final hosts (piscivorous fishes) (Esch and Huffines, 1973;  
448 Mitchell et al., 1983). Conversely, *C. marginatum* encysts in the fish's skin, gills and muscle, and can  
449 cause physical damage at the site of encystment due to its relatively large size (3 to 8 mm) (Lane and  
450 Morris, 2000). Although the taxonomy and distribution of *Clinostomum* and *Proteocephalus* species  
451 has been relatively well studied (Osborn, 1911; Mackie et al., 1983; Muzzall and Peebles, 1998;  
452 Caffara et al., 2011; Zimik et al., 2019), little is known about their effects on any of their host's  
453 physiology or behaviour. Our study is among the first to document decreases in physiological and  
454 behavioural performance in fishes with high loads of these parasites, which is surprising given their  
455 high prevalence and widespread distribution throughout North America.

456 Standard metabolic rate represents the minimum rate of energy expenditure required to sustain  
457 life and sets the floor for an animal's aerobic metabolic performance (Chabot et al., 2016b). Our  
458 results show that parasite infection can be associated with reductions in SMR. Although some studies  
459 suggest that parasites tend to increase host energy demands through immune stimulation and  
460 maintenance costs (Hvas and Bui, 2022), infection can conversely lead to metabolic suppression in  
461 hosts either through a reduction in organ or tissue (e.g. muscle) mass or a decrease in the function of  
462 organs associated with energy metabolism (Santoro et al., 2013; Mehrdana et al., 2014; Ryberg et al.,  
463 2020). Although a lower SMR can be advantageous in scenarios where food or oxygen are limited  
464 (Killen et al., 2016), reduced SMR associated with high parasite loads is more likely a pathological  
465 consequence of infection; since much of an individual's SMR is used to maintain internal organ  
466 function, damage caused by parasites can reduce organ function and thus, SMR (Hulbert and Else,  
467 2000; Seppänen et al., 2008; Behrens et al., 2014;; Ryberg et al., 2020). For example, Eastern Baltic  
468 cod, *Gadus morhua* infected with high intensities of the liver nematode, *Contracaecum osculatum*,

469 displayed lower SMR, reduced albumin to globulin ratio and lipid content suggesting that the  
470 metabolic function of this organ is compromised by high parasite loads (Ryberg et al., 2020).  
471 Similarly, *P. ambloplites* were mostly found in our fish's liver, which was often damaged when  
472 infection loads were high. This suggests a direct effect of *P. ambloplites* infection on host aerobic  
473 metabolic performance in these sunfish. Experimental infections are needed to establish a causal link  
474 between infection and decreased host performance in this system.

475       Maximum metabolic rate sets the ceiling for aerobic metabolic performance and is associated  
476 with increased performance during energetically demanding activities and in high- energy  
477 environments (Eliason et al., 2011; Binning et al., 2014; Norin and Clark, 2016). Our results show  
478 that internal organ damage caused by endoparasites likely reduces both MMR and SMR in hosts.  
479 Studies across taxa report decreases in host MMR with parasite infection (e.g. Careau et al., 2012;  
480 Bruneaux et al., 2017; Hvas et al., 2017). Importantly, a decrease in MMR is also often associated  
481 with a decrease in AS (Norin and Clark, 2016). We did not observe a decrease in AS with increasing  
482 internal parasite load across the entire range of internal parasites recorded (0 to 153 internal parasites),  
483 probably due to the lower MMR and SMR observed in heavily infected fish. This suggests that the  
484 lower MMR with increasing parasite load decreases somewhat faster than that of SMR, although this  
485 result remains marginal. Nevertheless, removing the most infected fish still resulted in an observable  
486 negative relationship between metabolic rates (MMR, SMR) and internal parasite load over a range  
487 of 0 to 50 internal parasites. Reduced AS can result in less capacity for growth, reproduction and,  
488 potentially, survival of heavily infected individuals (Metcalf et al., 2016). These relationships, and  
489 the potential ecological consequences in parasitized individuals, need to be explored more thoroughly.

490 Escape behaviour

491           Responsiveness to a simulated aerial attack was negatively correlated with internal parasite  
492 load, but not black spot trematodes. When startled, many fish species perform a characteristic C-start  
493 escape response, which is an important determinant of an individual's survival during a predator  
494 attack (Domenici et al., 2011). Escape distance and latency to respond to this attack are all considered  
495 important parts of this reaction (Domenici et al., 2011), and can all be impacted by infection (Allan  
496 et al., 2020). Yet, we found no relationship between parasite infection and response latency in our  
497 adult sunfish. Other studies on adult fish have also found no effect of parasites on escape performance.  
498 In bridled monocle bream, *Scolopsis bilineata*, parasitized by Anilocra isopod ectoparasites, response  
499 latency, maximum velocity, maximum acceleration and cumulative distance travelled did not differ  
500 between infected and uninfected fish (Binning et al., 2014). Similarly, Ruehle and Poulin, (2019)  
501 failed to detect a significant reduction in escape performance in infected common bully,  
502 *Gobiomorphus cotidianus*, even when host vision was affected.

503           Although the kinematic components of an animal's escape response offer useful predictors of  
504 an individual's escape performance, escape responsiveness is arguably the most important  
505 determinant of survival in the face of a threat (Domenici, 2010): an individual that does not react to  
506 an attacking predator has almost no chance of survival regardless of how fast it can escape. In our study,  
507 the two most heavily infected individuals never responded to our simulated aerial attack. Although the  
508 negative relationship we observed between responsiveness and parasite load is driven by the escape  
509 performance of these two individuals, our results remain ecologically relevant: we collected very few  
510 other heavily infected individuals possibly because these individuals are selectively removed from  
511 the population through predation. Over-dispersion of parasites within hosts, whereby few individuals  
512 harbour most of the parasites in a population, is a well-documented ecological phenomenon

513 (Anderson and Gordon, 1982). Although many factors can explain such patterns, including  
514 increased susceptibility and/or tolerance to infection in some individuals, our results suggest that  
515 performance reduction in heavily infected individuals may also play a role. If heavily infected  
516 individuals are predated upon at higher rates than uninfected or lightly infected individuals due, in  
517 part, to decreased responsiveness, we would expect to sample fewer of these individuals in a given  
518 population. This phenomenon would also facilitate trophic transmission and therefore be beneficial  
519 to the parasite life cycle.

## 520 Other considerations

521 Host life stage can play a large role in individual responses to parasites. For example, juvenile  
522 chipmunks, *Tamias striatus*, show a 7.6% increase in resting metabolic rate in response to infection  
523 by botfly larvae, resulting in a ~5g body mass loss over summer (Careau et al., 2010) whereas no  
524 effect of infection is observed in adults (Careau et al., 2012). It is possible that younger individuals  
525 are more affected by stressors, including infection, because more energy is required for growth and  
526 development (Careau et al., 2010; Allan et al., 2020). Older hosts also typically harbour more  
527 parasites than younger ones, probably because parasites are recruited faster than they die in hosts,  
528 especially in the case of encysted parasites such as those causing black spot disease (Hawlena et al.,  
529 2006). The fact that we did see strong relationships between internal infections and our performance  
530 measures, even in our adult fish, is a further reminder of the important impact that parasites can have  
531 on their hosts, and their contribution to otherwise unexplained intraspecific variation in performance  
532 often observed in natural populations (Timi and Poulin, 2020).

533 Our study explicitly quantified the load of infection of both externally visible and internally  
534 non-visible parasites. However, the process of counting and identifying endoparasites is difficult and

535 time-consuming, and often not included in the context of studies on wild populations. When infection  
536 is considered, the host's infection status (i.e. infected or not) is typically the variable of interest. This  
537 binomial categorization can be relevant and related to impact of parasites on some host populations,  
538 especially in the case of large endo- or ectoparasites (Fogelman et al., 2009; Jolles et al., 2020).  
539 However, parasite load can be more important than infection status for understanding the  
540 physiological, behavioural and ecological effects of parasites on their hosts (Poulin, 2019; Timi and  
541 Poulin, 2020). For instance, killifish, *Fundulus parvipinnis*, infected with larval trematodes face  
542 higher rates of predation by birds along an infection gradient (predation rates in uninfected hosts:  
543 0.02%, lightly infected hosts: 22%, heavily infected hosts: 80%) (Lafferty and Morris, 1996). As there  
544 are generally fewer highly parasitized individuals in natural host populations (Crofton, 1971; Shaw et  
545 al., 1998), it can be difficult to accurately estimate the effect of high parasite loads on populations  
546 because these individuals can be hard to sample and test in the lab. Heavily infected individuals may  
547 also be more susceptible to environmental stressors, which could potentially lead to selective  
548 mortality based on infection status during extreme events such as freezing or heat waves (Lemly and  
549 Esch, 1984; Bruneaux et al., 2017; Greenspan et al., 2017). The effects of concomitant stressors like  
550 temperature and parasite load have rarely been tested in natural populations and remains an area in  
551 need of further research especially given projected future global change.

## 552 Conclusion

553 Our results suggest that parasite load is an important, overlooked driver of intraspecific  
554 performance trait differences in host populations. Experimental infections are needed to confirm the  
555 causal relationship between infection load and performance traits in fish hosts. We expect  
556 experimental infection with black spot and/or internal parasites would result in similar performance

557 trait impairments as documented here. The fact that we were unable to link externally visible black  
558 spot infection with non-visible internal parasites is potentially problematic for experimental biologists  
559 since these visible infections are a poor proxy of overall infection load. Also, non-visible internal  
560 infections, which seem to be related to the highest performance costs, are less likely to be taken into  
561 consideration by experimental biologists. While we acknowledge that sacrificing individuals to  
562 quantify endoparasite infection is not always feasible or desirable in the context of experimental work  
563 on wild animals, we encourage researchers to consider alternative ways of controlling for this potential  
564 confounding effect such as treating experimental animals with anti-parasites treatments like  
565 praziquantel (Bader, 2017) prior to testing their performance after confirming that such treatments  
566 themselves do not impact the traits to be measured.

## 567 **Acknowledgements**

568 We thank the staff of the Station de biologie des Laurentides (SBL) de l'Université de  
569 Montréal, Gabriel Lanthier, Victoria Thelamon, Isabel Lanthier and Tom Bermingham for field and  
570 logistic support; Alexandra Kack, Xue Han Qu, Kaitlin Gallagher and Sean Locke for parasite  
571 identification; Amélie Papillon for help with fast-start analysis; and Shaun Killen for helpful  
572 comments and advice.

573

## 574 **Competing Interests**

575 No competing interests declared.

## 576 **Funding**

577 This work was supported by a Natural Sciences and Engineering Research Council of Canada  
578 Discovery grant (SAB) and the Canada Research Chair Program (SAB). JG was also supported by

579 UdeM's Joseph-Arthur-Palhus Foundation and the Écolac NSERC-CREATE scholarship program.

580

581

582 Data availability:

583 All data presented in this study are publicly available and can be downloaded here: doi:

584 10.6084/m9.figshare.19005971

585

586

587

588

589

590

591

592

593

594

595

596

597 **Allan, B. J. M., Fakan, E. P., Narvaez, P., Grutter, A. S., Sikkel, P. C., Mcclure, E. C.,**

598 **Rummer, J. L. and McCormick, M. I.** (2020). Parasite infection directly impacts escape  
599 response and stress levels in fish. *J. Exp. Biol.* **223**, 1–8.

600 **Anderson, R. M. and Gordon, D. M.** (1982). Processes influencing the distribution of parasite  
601 numbers within host populations with special emphasis on parasite-induced host mortalities.  
602 *Parasitology* **85**, 373–398.

603 **Arnold, S. J.** (1983). Morphology, performance and fitness. *Am. Zool.* **361**, 347–361.

- 604 **Bader, C. R.** (2017). Use of praziquantel for treatment of flatworm parasites in centrarchid fish.
- 605 **Bangham, R. H.** (1927). Life History of Bass Cestode *Proteocephalus Ambloplitis*. *Trans. Am.*  
606 *Fish. Soc.* 206–209.
- 607 **Bashir-Tanoli, S. and Tinsley, M. C.** (2014). Immune response costs are associated with changes  
608 in resource acquisition and not resource reallocation. *Funct. Ecol.* **28**, 1011–1019.
- 609 **Bates, D., Mächler, M., Bolker, B. M. and Walker, S. C.** (2014). Fitting linear mixed-effects  
610 models using lme4. *J. Stat. Softw.* **67**, 1–51.
- 611 **Behrens, J. W., Seth, H., Axelsson, M. and Buchmann, K.** (2014). The parasitic copepod  
612 *Lernaeocera branchialis* negatively affects cardiorespiratory function in *Gadus morhua*. *J. Fish*  
613 *Biol.* 1599–1606.
- 614 **Bennett, A. F.** (1980). The thermal dependence of lizard behaviour. *Anim. Behav.* **28**, 752–762.
- 615 **Berra, T. M. and Au, R.-J.** (1978). Incidence of black spot disease in fishes in Cedar Fork Creek,  
616 Ohio. *Ohio J. Sci.* **78**, 318–322
- 617 **Binning, S. A., Barnes, J. I., Davies, J. N., Backwell, P. R. Y., Keogh, J. S. and Roche, D. G.**  
618 (2014). Ectoparasites modify escape behaviour, but not performance, in a coral reef fish. *Anim.*  
619 *Behav.* **93**, 1–7.
- 620 **Binning, S. A., Shaw, A. K. and Roche, D. G.** (2017). Parasites and host performance:  
621 Incorporating infection into our understanding of animal movement. *Integr. Comp. Biol.* **57**,  
622 267–280.
- 623 **Blake, R. W., Kwok, P. Y. L. and Chan, K. H. S.** (2006). Effects of two parasites,  
624 *Schistocephalus solidus* (Cestoda) and *Bunodera* spp. (Trematoda), on the escape fast-start  
625 performance of three-spined sticklebacks. *J. Fish Biol.* **69**, 1345–1355.
- 626 **Bordes, F. and Morand, S.** (2011). The impact of multiple infections on wild animal hosts: a  
627 review. *Infect. Ecol. Epidemiol.* **1**, 7346.
- 628 **Bradley, C. A. and Altizer, S.** (2005). Parasites hinder monarch butterfly flight: Implications for  
629 disease spread in migratory hosts. *Ecol. Lett.* **8**, 290–300.
- 630 **Brett, J. R. and Sutherland, D. B.** (1965). Respiratory metabolism of pumpkinseed (*Lepomis*  
631 *gibbosus*) in relation to swimming speed. *J. Fish Res. BD. Canada* **22**, 0–4.
- 632 **Bruneaux, M., Visse, M., Gross, R., Pukk, L., Saks, L. and Vasemägi, A.** (2017). Parasite  
633 infection and decreased thermal tolerance: impact of proliferative kidney disease on a wild  
634 salmonid fish in the context of climate change. *Funct. Ecol.* **31**, 216–226.
- 635 **Caballero, I. C., Sakla, A. J., Detwiler, J. T., Gall, M. Le, Behmer, T. and Criscione, C. D.**  
636 (2015). Physiological status drives metabolic rate in mediterranean Geckos infected with  
637 pentastomes. *PLoS One* **10**, 1–14.
- 638 **Caffara, M., Locke, S. A., Gustinelli, A., Marcogliese, D. J. and Fioravanti, M. L.** (2011).  
639 Morphological and molecular differentiation of *clinostomum complanatum* and *clinostomum*  
640 *marginatum* (Digenea: Clinostomidae) metacercariae and adults. *J. Parasitol.* **97**, 884–891.
- 641 **Careau, V., Thomas, D. W. and Humphries, M. M.** (2010). Energetic cost of bot fly parasitism in



- 642 free-ranging eastern chipmunks. *Physiol. Ecol.* 303–312.
- 643 **Careau, V., Garant, D. and Humphries, M. M.** (2012). Free-ranging eastern chipmunks (*Tamias*  
644 *striatus*) infected with bot fly (*Cuterebra emasculator*) larvae have higher resting but lower  
645 maximum metabolism. *Can. J. Zool.* **421**, 413–421.
- 646 **Chabot, D.** (2016) fishMO2: Calculate and plot the standard metabolic rate (SMR), the critical  
647 oxygen level (O<sub>2</sub>crit) and the specific dynamic action (SDA) and related variables in fishes  
648 and crustaceans
- 649 **Chabot, D., McKenzie, D. J. and Craig, J. F.** (2016a). Metabolic rate in fishes: Definitions,  
650 methods and significance for conservation physiology. *J. Fish Biol.* **88**, 1–9.
- 651 **Chabot, D., Steffensen, J. F. and Farrell, A. P.** (2016b). The determination of standard metabolic  
652 rate in fishes. *J. Fish Biol.* **88**, 81–121.
- 653 **Chapman, J. M., Marcogliese, D. J., Suski, C. D. and Cooke, S. J.** (2015). Variation in parasite  
654 communities and health indices of juvenile *Lepomis gibbosus* across a gradient of watershed  
655 land-use and habitat quality. *Ecol. Indic.* **57**, 564–572.
- 656 **Claireaux, G. and Lefrançois, C.** (2007). Linking environmental variability and fish performance:  
657 Integration through the concept of scope for activity. *Philos. Trans. R. Soc. B Biol. Sci.* **362**,  
658 2031–2041.
- 659 **Clark, T. D., Sandblom, E. and Jutfelt, F.** (2013). Aerobic scope measurements of fishes in an era  
660 of climate change: respirometry, relevance and recommendations. *J. Exp. Biol.* **216**, 2771–  
661 2782.
- 662 **Coleman, F. C.** (1993). Morphological and physiological consequences of parasites encysted in the  
663 *bulbus arteriosus* of an estuarine fish, the sheepshead minnow, *Cyprinodon variegatus*. *J.*  
664 *Parasitol.* **79**, 247–254.
- 665 **Crans, K. D., Pranckevicius, N. A. and Scott, G. R.** (2015). Physiological tradeoffs may underlie  
666 the evolution of hypoxia tolerance and exercise performance in sunfish (*Centrarchidae*). *J.*  
667 *Exp. Biol.* **218**, 3264–3275.
- 668 **Crofton, H.** (1971). A quantitative approach to parasitism. *Parasitology*, **62**, 179-193
- 669 **Daly Sr., J. J., Keller, R. J. and DeYoung, B.** (2006). Hyperinfection with the Bass Tapeworm,  
670 *Proteocephalus ambloplites* (Cestoda), in the Black Basses *Micropterus punctulatus* and *M.*  
671 *dolomieu* from Certain Arkansas Reservoir Lakes. *J. Ark. Acad. Sci.* **60**, 171–172.
- 672 **Domenici, P.** (2010). Context-dependent variability in the components of fish escape response:  
673 Integrating locomotor performance and behavior. *J. Exp. Zool. Part A Ecol. Genet. Physiol.*  
674 **313 A**, 59–79.
- 675 **Domenici, P. and Blake, R. W.** (1997). The kinematics and performance of fish fast-start  
676 swimming. *J. Exp. Biol.* **200**, 1165–1178.
- 677 **Domenici, P., Blagburn, J. M. and Bacon, J. P.** (2011). Animal escapology I: Theoretical issues  
678 and emerging trends in escape trajectories. *J. Exp. Biol.* **214**, 2463–2473.
- 679 **Dougherty, E. R., Carlson, C. J., Bueno, V. M., Burgio, K. R., Cizauskas, C. A., Clements, C.**

- 680 **F., Seidel, D. P. and Harris, N. C.** (2016). Paradigms for parasite conservation. *Conserv. Biol.*  
681 **30**, 724–733.
- 682 **Eaton, R. C., Lee, R. K. K. and Foreman, M. B.** (2001). The Mauthner cell and other identified  
683 neurons of the brainstem escape network of fish. *Prog. Neurobiol.* **63**, 467–485.
- 684 **Eliason, E. J., Clark, T. D., Hague, M. J., Hanson, L. M., Gallagher, Z. S., Jeffries, K. M.,**  
685 **Gale, M. K., Patterson, D. A., Hinch, S. G. and Farrell, A. P.** (2011). Differences in thermal  
686 tolerance among sockeye salmon populations. *Science (80-. )*. **332**, 109–112.
- 687 **Eraud, C., Duriez, O., Chastel, O. and Faivre, B.** (2005). The energetic cost of humoral  
688 immunity in the Collared Dove, *Streptopelia decaocto*: Is the magnitude sufficient to force  
689 energy-based trade-offs? *Funct. Ecol.* **19**, 110–118.
- 690 **Esch, G. W. and Huffines, W. J.** (1973). Histopathology associated with endoparasitic helminths  
691 in bass. *J. Parasitol.* **59**, 306–313.
- 692 **Ferguson, J. A., Schreck, C. B., Chitwood, R. and Kent, M. L.** (2010). Persistence of infection  
693 by metacercariae of apophallus sp., Neascus sp., and nanophyetus salmincola plus two  
694 myxozoans (*Myxobolus insidiosus* and *Myxobolus fryeri*) in Coho Salmon *oncorhynchus*  
695 *kisutch*. *J. Parasitol.* **96**, 340–347.
- 696 **Fogelman, R. M., Kuris, A. M. and Grutter, A. S.** (2009). Parasitic castration of a vertebrate:  
697 Effect of the cymothoid isopod, *Anilocra apogonae*, on the five-lined cardinalfish,  
698 *Cheilodipterus quinquelineatus*. *Int. J. Parasitol.* **39**, 577–583.
- 699 **Fox, J. & Weisberg, S.** (2011). *An R Companion to Applied Regression*. Thousand Oaks, CA: Sage.
- 700 **Gentile, M. E. and King, I. L.** (2018). Blood and guts: The intestinal vasculature during health and  
701 helminth infection. *PLoS Pathog.* **14**, 1–5.
- 702 **Gerry, S. P., Robbins, A. and Ellerby, D. J.** (2012). Variation in fast-start performance within a  
703 population of polyphenic bluegill (*Lepomis macrochirus*). *Physiol. Biochem. Zool.* **85**, 693–  
704 703.
- 705 **Greenspan, S. E., Bower, D. S., Roznik, E. A., Pike, D. A., Alford, R. A., Schwarzkopf, L. and**  
706 **Scheffers, B. R.** (2017). Infection increases vulnerability to climate change via effects on host  
707 thermal tolerance. *Sci. Rep.* 1–10.
- 708 **Halsey, L. G., Killen, S. S., Clark, T. D. and Norin, T.** (2018). Exploring key issues of aerobic  
709 scope interpretation in ectotherms: absolute versus factorial. *Rev. Fish Biol. Fish.* **28**, 405–415.
- 710 **Happel, A.** (2019). A volunteer-populated online database provides evidence for a geographic  
711 pattern in symptoms of black spot infections. *Int. J. Parasitol. Parasites Wildl.* **10**, 156–163.
- 712 **Hariato, J., Carey, N. and Byrne, M.** (2019). respR—An R package for the manipulation and  
713 analysis of respirometry data. *Methods Ecol. Evol.* **10**, 912–920.
- 714 **Hartig, F.** (2022). DHARMA: Residual Diagnostics for Hierarchical (Multi-Level / Mixed)  
715 Regression Models. R package version 0.4.5. <https://CRAN.R-project.org/package=DHARMA>  
716
- 717 **Hawlana, H., Abramsky, Z. and Krasnov, B. R.** (2006). Ectoparasites and age-dependent survival  
718 in a desert rodent. *Oecologia* **148**, 30–39.

- 719 **Hockett, C. T. and Mundahl, N. D.** (1989). Effects of black spot disease on thermal tolerances and  
720 condition factors of three cyprinid fishes. *J. Freshw. Ecol.* **5**, 67–72.
- 721 **Huggins, E.** (1959). Parasites of Fishes in South Dakota. *Bulletin* 1–73.
- 722 **Hulbert, A. J. and Else, P. L.** (2000). Mechanisms underlying the cost of living in animals. *Annu.*  
723 *Rev. Physiol.* **62**, 207–235.
- 724 **Hunter, G. W. and Hunter, W. S.** (1934). The life cycle of the yellow grub of fish. *J. Parasitol.*  
725 **20**, 325
- 726 **Hunter, G. W. and Hunter, W. S.** (1938). Studies on Host Reaction to Larval Parasites. *J. Parasitol.*  
727 **24**, 477–481
- 728 **Hvas, M. and Bui, S.** (2022). Energetic costs of ectoparasite infection in Atlantic salmon. *J. Exp.*  
729 *Biol.*
- 730 **Hvas, M., Mæhle, S., Oppedal, F., Wright, D. W., Karlsbakk, E., Mæhle, S., Wright, D. W.**  
731 **and Oppedal, F.** (2017). The gill parasite *Paramoeba perurans* compromises aerobic scope,  
732 swimming capacity and ion balance in Atlantic salmon. *Conserv. Physiol.* **5**, 1–12.
- 733 **Jolles, J. W., Mazué, G. P. F., Davidson, J., Behrmann-Godel, J. and Couzin, I. D.** (2020).  
734 *Schistocephalus* parasite infection alters sticklebacks' movement ability and thereby shapes  
735 social interactions. *Sci. Rep.* **10**, 1–11.
- 736 **Jornod, M. and Roche, D. G.** (2015). Inter- vs intra-individual variation and temporal repeatability  
737 of escape responses in the coral reef fish *Amblyglyphidodon curacao*. *Biol. Open* **4**, 1395–  
738 1399.
- 739 **Killen, S. S., Glazier, D. S., Rezende, E. L., Clark, T. D., Atkinson, D., Willener, A. S. T. and**  
740 **Halsey, L. G.** (2016). Ecological influences and morphological correlates of resting and  
741 maximal metabolic rates across teleost fish species. *Am. Nat.* **187**, 592–606.
- 742 **Killen, S. S., Christensen, E. A. F., Cortese, D., Závorka, L., Norin, T., Cotgrove, L., Crespel,**  
743 **A., Munson, A., Nati, J. J. H., Papatheodoulou, M., et al.** (2021). Guidelines for reporting  
744 methods to estimate metabolic rates by aquatic intermittent-flow respirometry. *J. Exp. Biol.*  
745 **224**,.
- 746 **Kuris, A. M.** (2003). Evolutionary ecology of trophically transmitted parasites. *J. Parasitol.* **89**,  
747 S96–S100.
- 748 **Kuris, A. M., Hechinger, R. F., Shaw, J. C., Whitney, K. L., Aguirre-Macedo, L., Boch, C. A.,**  
749 **Dobson, A. P., Dunham, E. J., Fredensborg, B. L., Huspeni, T. C., et al.** (2008). Ecosystem  
750 energetic implications of parasite and free-living biomass in three estuaries. *Nature* **454**, 515–  
751 518.
- 752 **Lafferty, K. D. and Morris, K. A.** (1996). Altered behavior of parasitized killifish increases  
753 susceptibility to predation by bird final hosts. *Ecology* **77**, 1390–1397.
- 754 **Lagrange, C. and Poulin, R.** (2015). Measuring fish body condition with or without parasites : does  
755 it matter ? *J. Fish Biol.* 836–847.
- 756 **Lane, R. L. and Morris, J. E.** (2000). Biology, prevention, and effects of common grubs (digenetic

- 757 trematodes) in freshwater fish. *Tech. Bull. Ser.* **115**, 1–6.
- 758
- 759 **Lemly, D. A. and Esch, G. W.** (1984). Effects of the trematode *Uvulifer ambloplitis* on juvenile  
760 Bluegill sunfish, *Lepomis macrochirus*: ecological implications. *Am. Soc. Parasitol.* **70**, 475–  
761 492.
- 762 **Mackie, G. L., Morton, W. B. and Ferguson, M. S.** (1983). Fish parasitism in a new  
763 impoundment and differences upstream and downstream. *Hydrobiologia* **99**, 197–205.
- 764 **Marcogliese, D. J.** (2004). Parasites : small players with crucial roles in the ecological theater.  
765 *Ecohealth* 151–164.
- 766 **Margolis, L. and Arthur, J. R.** (1979). Synopsis of the parasites of fishes of Canada. Bull. Fish.  
767 Res. Board Can. No. 199
- 768 **Marras, S., Killen, S. S., Claireaux, G., Domenici, P. and McKenzie, D. J.** (2011). Behavioural  
769 and kinematic components of the fast-start escape response in fish: individual variation and  
770 temporal repeatability. *J. Exp. Biol.* **214**, 3102–3110.
- 771 **McElroy, E. J. and de Buron, I.** (2014). Host performance as a target of manipulation by  
772 parasites: a meta-analysis. *J. Parasitol.* **100**, 399–410.
- 773 **McElroy, E. J., George, A. and de Buron, I.** (2015). The muscle dwelling myxozoan, *Kudoa*  
774 *inornata*, enhances swimming performance in the spotted seatrout, *Cynoscion nebulosus*.  
775 *Parasitol. Res.* **114**, 2451–2457.
- 776 **Mehrdana, F., Bahlool, Q. Z. M., Skov, J., Marana, M. H., Sindberg, D., Mundeling, M.,  
777 Overgaard, B. C., Korbut, R., Strøm, S. B., Kania, P. W., et al.** (2014). Occurrence of  
778 zoonotic nematodes *Pseudoterranova decipiens*, *Contracaecum osculatum* and *Anisakis*  
779 *simplex* in cod (*Gadus morhua*) from the Baltic Sea. *Vet. Parasitol.* **205**, 581–587.
- 780 **Metcalf, N. B., Van Leeuwen, T. E. and Killen, S. S.** (2016). Does individual variation in  
781 metabolic phenotype predict fish behaviour and performance? *J. Fish Biol.* **88**, 298–321.
- 782 **Mitchell, L. G., Ginal, J. and Bailey, W. C.** (1983). Melanotic visceral fibrosis associated with  
783 larval infections of *Posthodiplostomum minimum* and *Proteocephalus* sp. in bluegill, *Lepomis*  
784 *macrochirus* Rafinesque, in central Iowa, U.S.A. *J. Fish Dis.* **6**, 135–144.
- 785 **Muzzall, P. M. and Peebles, C. R.** (1998). Parasites of Bluegill, *Lepomis macrochirus*, from Two  
786 Lakes and a Summary of Their Parasites from Michigan. *Comp. Parasitol.* **65**, 201–204.
- 787 **Norin, T. and Clark, T. D.** (2016). Measurement and relevance of maximum metabolic rate in  
788 fishes. *J. Fish Biol.* **88**, 122–151.
- 789 **O'Dwyer, K., Dargent, F., Forbes, M. R. and Koprivnikar, J.** (2020). Parasite infection leads to  
790 widespread glucocorticoid hormone increases in vertebrate hosts: A meta-analysis. *J. Anim.*  
791 *Ecol.* **89**, 519–529.
- 792 **Osborn, H. L.** (1911). On the distribution and mode of occurrence in the United States and Canada  
793 of *Clinostomum marginatum*, a trematode parasitic in fish, frogs and birds. *Biol. Bull.* 350–  
794 366.

- 795 **Parker, G. A., Ball, M. A. and Chubb, J. C.** (2015). Evolution of complex life cycles in  
796 trophically transmitted helminths. I. Host incorporation and trophic ascent. *J. Evol. Biol.* **28**,  
797 267–291.
- 798 **Poulin, R.** (2019). Best practice guidelines for studies of parasite community ecology. *J.*  
799 *Helminthol.* **93**, 8–11.
- 800 **Poulin, R. and Morand, S.** (2000). The Diversity of Parasites. *Q. Rev. Biol.* **75**, 277–293.
- 801 **Poulin, R., Brodeur, J. and Moore, J.** (1994). Parasite manipulation of host behaviour : should  
802 hosts always lose ? *Oikos* **70**, 479–484.
- 803 **Roche, D. G.** (2021). Effects of wave-driven water flow on the Fast-Start escape response of  
804 juvenile coral reef damselfishes. *J. Exp. Biol.* **224**,.
- 805 **Roche, D. G., Binning, S. A., Bosiger, Y., Johansen, J. L. and Rummer, J. L.** (2013). Finding  
806 the best estimates of metabolic rates in a coral reef fish. *J. Exp. Biol.* **216**, 2103–2110.
- 807 **Ruehle, B. and Poulin, R.** (2019). No impact of a presumed manipulative parasite on the responses  
808 and susceptibility of fish to simulated predation. *Ethology* **125**, 745–754.
- 809 **Rummer, J. L., Binning, S. A., Roche, D. G. and Johansen, J. L.** (2016). Methods matter:  
810 Considering locomotory mode and respirometry technique when estimating metabolic rates of  
811 fishes. *Conserv. Physiol.* **4**, 1–13.
- 812 **Ryberg, M. P., Skov, P. V., Vendramin, N., Buchmann, K., Nielsen, A. and Behrens, J. W.**  
813 (2020). Physiological condition of Eastern Baltic cod, *Gadus morhua*, infected with the  
814 parasitic nematode *Contracaecum osculatum*. *Conserv. Physiol.* **8**, 1–14.
- 815 **Santoro, M., Mattiucci, S., Work, T., Cimmaruta, R., Nardi, V., Cipriani, P., Bellisario, B. and**  
816 **Nascetti, G.** (2013). Parasitic infection by larval helminths in Antarctic fishes: Pathological  
817 changes and impact on the host body condition index. *Dis. Aquat. Organ.* **105**, 139–148.
- 818 **Seppänen, E., Kuukka, H., Huuskonen, H. and Piironen, J.** (2008). Relationship between  
819 standard metabolic rate and parasite-induced cataract of juveniles in three Atlantic salmon  
820 stocks. *J. Fish Biol.* **72**, 1659–1674.
- 821 **Shaw, D. J., Grenfell, B. T. and Dobson, P. A.** (1998). Patterns of macroparasite aggregation in  
822 wildlife host populations. *Parasitology* **117**, 597–610.
- 823 **Spagnoli, S., Xue, L. and Kent, M. L.** (2015). The common neural parasite *Pseudoloma*  
824 *neurophilia* is associated with altered startle response habituation in adult zebrafish (*Danio*  
825 *rerio*): Implications for the zebrafish as a model organism. *Behav. Brain Res.* **291**, 351–360.
- 826 **Spagnoli, S., Sanders, J., Kent, M. L., Brito, D. and Batista, S.** (2017). The common neural  
827 parasite *Pseudoloma neurophilia* causes altered shoaling behavior in adult laboratory zebrafish  
828 (*Danio rerio*) and its implications for neurobehavioral research. *J. Fish Dis.* **40**, 443–446.
- 829 **Sun, N. W., Goodwin, S. E., Griego, M. S., Gerson, A. R. and Clotfelter, E. D.** (2020). Does  
830 blood loss explain higher resting metabolic rates in nestling birds with hematophagous  
831 ectoparasites? *J. Avian Biol.* 1–8.
- 832 **Timi, J. T. and Poulin, R.** (2020). Why ignoring parasites in fish ecology is a mistake. *Int. J.*

- 833            *Parasitol.* **50**, 755–761.
- 834    **Tytell, E. D. and Lauder, G. V.** (2008). Hydrodynamics of the escape response in bluegill sunfish,  
835            *Lepomis macrochirus*. *J. Exp. Biol.* **211**, 3359–3369.
- 836    **Vaughans, G. E. and Coble, D. W.** (1975). Sublethal effects of three ectoparasites on fish. *J. Fish*  
837            *Biol.* 283–294.
- 838    **Wilson, R. S., Husak, J. F., Halsey, L. G. and Clemente, C. J.** (2015). Predicting the Movement  
839            Speeds of Animals in Natural Environments. *Integr. Comp. Biol.* **55**, 1125–1141.
- 840    **Zimik, P., Sharma, S. and Roy, B.** (2019). Characterization of *Clinostomum metacercariae* using  
841            microscopic and molecular approaches. *Ann. Parasitol.* **65**, 87–97.
- 842
